# Supplementary material
Source: ML conference proceedings conference paper supplement (https://www.ecva.net/papers/eccv_2020/papers_ECCV/html/123610069_ECCV_2020_paper.php)
Supplement: Supplementary file 3 [file 123610069-supp.zip]

Archive with 9 entries (6 files):
- 2497-supp/
- 2497-supp/.DS_Store
- __MACOSX/
- __MACOSX/2497-supp/
- __MACOSX/2497-supp/._.DS_Store
- 2497-supp/2497-supp.mp4
- __MACOSX/2497-supp/._2497-supp.mp4
- 2497-supp/2497-supp.pdf
- __MACOSX/2497-supp/._2497-supp.pdf
